# Supplementary figures and images for: Construction of TiO2–MnO2 0D–2D nanostructured heterojunction for enhanced photocatalytic hydrogen production
Source: Royal Society of Chemistry journal article supplement (doi:10.1039/d1dt01233a), 2021-01-01

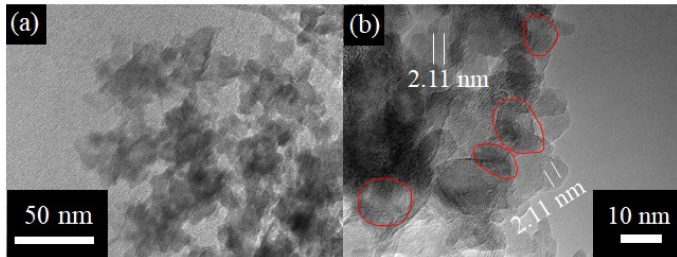

Supplement: d1dt01233a2.pdf [file d1dt01233a2.pdf]

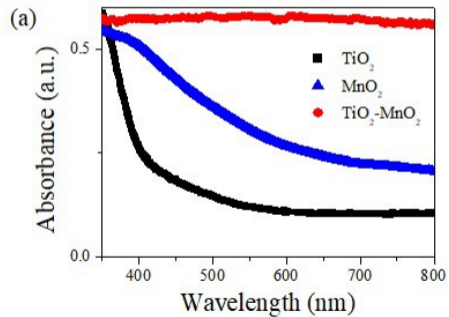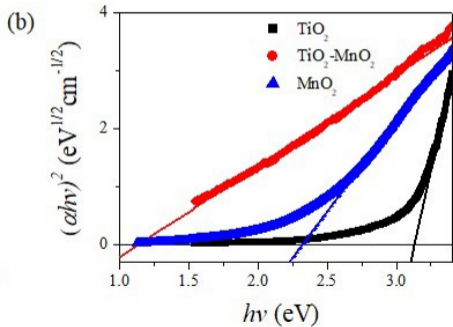

Supplement: d1dt01233a4.pdf [file d1dt01233a4.pdf]
